# Supplementary material for: A general metal free approach to α-ketoamides via oxidative amidation–diketonization of terminal alkynes
Source: Royal Society of Chemistry journal article supplement (doi:10.1039/c4cc03783a), 2014-01-01

## Supporting Information

### **A general metal free approach to $\alpha$ -ketoamides via oxidative amidation-diketonization of terminal alkynes**

*Ramesh Dshidi, Manjeet Kumar, Shekhar Devari and Bhahwal Ali Shah\**

Academy of Scientific and Innovative Research (AcSIR); Natural Product Microbes, CSIR-Indian Institute of Integrative Medicine, Canal Road, Jammu -Tawi, 180001.

E-mail: [bashah@iiim.res.in](mailto:bashah@iiim.res.in)

## General procedure for synthesis of $\alpha$ -ketoamides

TMSOTf (444  $\mu$ l, 2mmol) was added to a solution of terminal alkyne (102  $\mu$ L, 1mmol) in DMSO (1 ml) followed by the addition of iodine in catalytic amount and amine (1.5 mmol). The reaction mixture was then heated at 80  $^{\circ}$ C for 6 h and the product formation was monitored by TLC. After completion, reaction mixture was extracted with ethyl acetate (3 x 50ml). The combined organic layers were washed with brine solution, concentrated on rotary evaporator and purified by column chromatography using ethyl acetate and hexane to afford corresponding pure products.

**Note:** Sometimes the TMSOTf evaporates during addition; in those cases further addition of TMSOTf may be required.

## Spectroscopic Data:

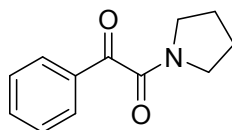

**3aa**

**1-phenyl-2-(pyrrolidin-1-yl)ethane-1,2-dione (3aa):**  $^1\text{H}$  NMR (400 MHz,  $\text{CDCl}_3$ )  $\delta$  8.07 – 7.92 (m, 2H), 7.70 – 7.58 (m, 1H), 7.58 – 7.44 (m, 2H), 3.75 – 3.60 (m, 2H), 3.50 – 3.35 (m, 2H), 1.32 – 1.16 (m, 4H);  $^{13}\text{C}$  NMR (100 MHz,  $\text{CDCl}_3$ )  $\delta$  191.5, 164.9, 134.5, 133.0, 129.8, 128.9, 46.6, 45.2, 25.9, 24.0.

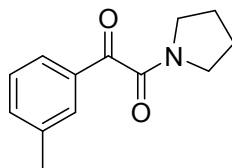

**3ab**

**1-(pyrrolidin-1-yl)-2-(m-tolyl)ethane-1,2-dione (3ab):**  $^1\text{H}$  NMR (400 MHz,  $\text{CDCl}_3$ )  $\delta$  7.79 (d,  $J$  = 6.7 Hz, 2H), 7.45 (d,  $J$  = 7.7 Hz, 1H), 7.39 (t,  $J$  = 7.9 Hz, 1H), 3.66 (t,  $J$  = 6.6 Hz, 2H), 3.42 (t,  $J$  = 6.4 Hz, 2H), 2.42 (s, 3H), 2.00 – 1.91 (m, 4H);  $^{13}\text{C}$  NMR (100 MHz,  $\text{CDCl}_3$ )  $\delta$  191.8, 165.1, 138.9, 135.4, 133.0, 130.2, 128.8, 127.2, 46.7, 45.2, 25.9, 24.0.

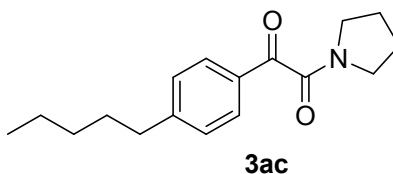

**1-(4-pentylphenyl)-2-(pyrrolidin-1-yl)ethane-1,2-dione (3ac):**  $^1\text{H}$  NMR (400 MHz,  $\text{CDCl}_3$ )  $\delta$  7.90 (d,  $J = 8.2$  Hz, 2H), 7.30 (d,  $J = 8.1$  Hz, 2H), 3.66 (t,  $J = 6.6$  Hz, 2H), 3.43 (t,  $J = 6.4$  Hz, 2H), 2.67 (t, 2H), 1.95 (m, 2H), 1.63 (m, 4H), 1.37 – 1.27 (m, 6H), 0.89 (t,  $J = 4.8$  Hz, 3H);  $^{13}\text{C}$  NMR (100 MHz,  $\text{CDCl}_3$ )  $\delta$  191.3, 165.2, 150.7, 130.7, 130.1, 129.0, 46.6, 45.2, 36.2, 31.4, 30.7, 25.9, 24.0, 22.5, 13.9.

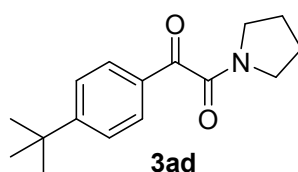

**1-(4-(tert-butyl)phenyl)-2-(pyrrolidin-1-yl)ethane-1,2-dione (3ad):**  $^1\text{H}$  NMR (400 MHz,  $\text{CDCl}_3$ )  $\delta$  7.93 (d,  $J = 8.5$  Hz, 2H), 7.52 (d,  $J = 8.5$  Hz, 2H), 3.65 (t,  $J = 6.7$  Hz, 2H), 3.42 (t,  $J = 6.4$  Hz, 2H), 1.95 (m, 4H), 1.34 (s, 9H);  $^{13}\text{C}$  NMR (125 MHz,  $\text{CDCl}_3$ )  $\delta$  191.4, 165.2, 158.7, 130.3, 129.9, 125.9, 46.7, 45.2, 35.3, 31.0, 25.9, 24.0.

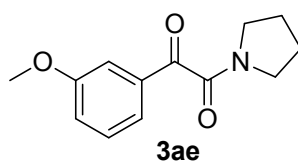

**1-(3-methoxyphenyl)-2-(pyrrolidin-1-yl)ethane-1,2-dione (3ae):**  $^1\text{H}$  NMR (400 MHz,  $\text{CDCl}_3$ )  $\delta$  7.63 – 7.47 (m, 2H), 7.39 (dd,  $J = 18.4, 10.7$  Hz, 1H), 7.17 (dt,  $J = 15.6, 7.9$  Hz, 1H), 3.86 (d,  $J = 4.9$  Hz, 3H), 3.65 (t,  $J = 6.7$  Hz, 2H), 3.48 – 3.36 (m, 2H), 2.08 – 1.88 (m, 4H);  $^{13}\text{C}$  NMR (100 MHz,  $\text{CDCl}_3$ )  $\delta$  191.5, 164.9, 160.0, 134.2, 130.0, 123.1, 121.5, 112.9, 55.5, 46.6, 45.2, 25.9, 24.0.

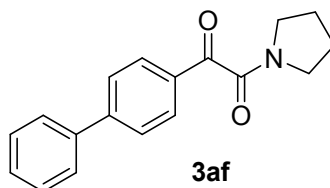

**1-([1,1'-biphenyl]-4-yl)-2-(pyrrolidin-1-yl)ethane-1,2-dione (3af):**  $^1\text{H}$  NMR (400 MHz,  $\text{CDCl}_3$ )  $\delta$  7.99 (d,  $J = 8.4$  Hz, 2H), 7.64 (d,  $J = 8.4$  Hz, 2H), 7.56 (m, 2H), 7.41 (t,  $J = 7.3$  Hz, 2H), 7.34 (t,  $J = 7.3$ ,

1H), 3.60 (t,  $J = 6.8$  Hz, 2H), 3.39 (t,  $J = 6.6$  Hz, 2H), 1.89 (m, 4H);  $^{13}\text{C}$  NMR (100 MHz,  $\text{CDCl}_3$ )  $\delta$  191, 164.9, 147.3, 139.6, 131.7, 130.5, 129.02, 128.5, 127.6, 127.3, 46.7, 45.3, 25.9, 24.0.

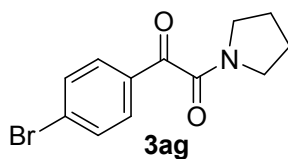

**1-(4-bromophenyl)-2-(pyrrolidin-1-yl)ethane-1,2-dione (3ag);**  $^1\text{H}$  NMR (400 MHz,  $\text{CDCl}_3$ )  $\delta$  7.96 – 7.79 (m, 2H), 7.72 – 7.57 (m, 2H), 3.64 (t,  $J = 7.0$  Hz, 2H), 3.44 (dd,  $J = 8.1, 5.3$  Hz, 2H), 2.06 – 1.88 (m, 4H);  $^{13}\text{C}$  NMR (100 MHz,  $\text{CDCl}_3$ )  $\delta$  190.3, 164.2, 132.3, 131.7, 131.3, 130.1, 46.8, 45.4, 25.9, 24.0.

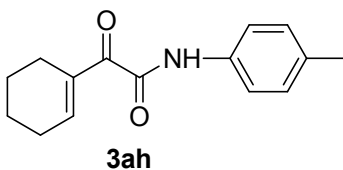

**2-(cyclohex-1-en-1-yl)-2-oxo-N-(p-tolyl)acetamide:**  $^1\text{H}$  NMR (400 MHz,  $\text{CDCl}_3$ )  $\delta$  8.01 (ddd,  $J = 5.6, 4.1, 1.6$  Hz, 1H), 7.53 – 7.48 (m, 2H), 7.19 – 7.13 (m, 2H), 2.42 – 2.26 (m, 7H), 1.76 – 1.58 (m, 4H);  $^{13}\text{C}$  NMR (100 MHz,  $\text{CDCl}_3$ )  $\delta$  187.7, 159.4, 151.0, 135.6, 134.7, 134.2, 129.6, 119.8, 26.9, 23.3, 21.7, 21.2.

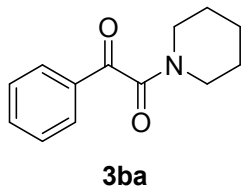

**1-phenyl-2-(piperidin-1-yl)ethane-1,2-dione (3ba) :**  $^1\text{H}$  NMR (400 MHz,  $\text{CDCl}_3$ )  $\delta$  7.98 – 7.90 (m, 2H), 7.71 – 7.59 (m, 1H), 7.56 – 7.46 (m, 2H), 3.70 (d,  $J = 5.5$  Hz, 2H), 3.40 – 3.24 (m, 2H), 1.77 – 1.66 (m, 4H), 1.57 (dd,  $J = 17.4, 12.1$  Hz, 2H);  $^{13}\text{C}$  NMR (100 MHz,  $\text{CDCl}_3$ )  $\delta$  191.9, 165.4, 134.5, 133.3, 129.5, 128.9, 47.0, 42.1, 26.2, 25.4, 24.4.

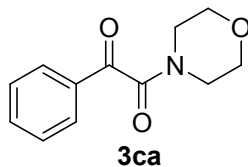

**1-morpholino-2-phenylethane-1,2-dione (3ca):**  $^1\text{H}$  NMR (400 MHz,  $\text{CDCl}_3$ )  $\delta$  8.01 – 7.90 (m, 2H), 7.66 (t,  $J = 7.4$  Hz, 1H), 7.53 (t,  $J = 7.7$  Hz, 2H), 3.81 (d,  $J = 6.4$  Hz, 4H), 3.70 – 3.60 (m, 2H), 3.47 – 3.31 (m, 2H);  $^{13}\text{C}$  NMR (100 MHz,  $\text{CDCl}_3$ )  $\delta$  191.1, 165.4, 134.9, 133.0, 129.6, 129.1, 66.6, 66.6, 46.2, 41.5.

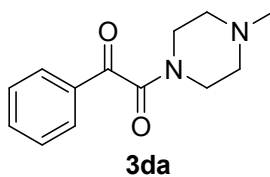

**1-(4-methylpiperazin-1-yl)-2-phenylethane-1,2-dione (3da):**  $^1\text{H}$  NMR (400 MHz,  $\text{CDCl}_3$ )  $\delta$  8.02 – 7.90 (m, 2H), 7.77 – 7.58 (m, 1H), 7.52 (dd,  $J = 10.7, 4.7$  Hz, 2H), 3.91 – 3.76 (m, 2H), 3.46 – 3.32 (m, 2H), 2.64 – 2.47 (m, 2H), 2.40 (dd,  $J = 17.6, 12.5$  Hz, 2H), 2.33 (s, 3H);  $^{13}\text{C}$  NMR (100 MHz,  $\text{CDCl}_3$ )  $\delta$  191.56, 165.34, 134.81, 133.08, 129.55, 129.04, 54.81, 54.36, 45.83, 45.68, 41.04.

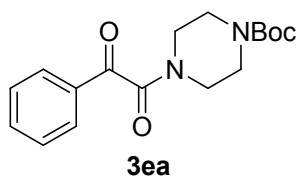

**tert-butyl 4-(2-oxo-2-phenylacetyl)piperazine-1-carboxylate (3ea):**  $^1\text{H}$  NMR (400 MHz,  $\text{CDCl}_3$ )  $\delta$  8.01 – 7.92 (m, 2H), 7.68 – 7.61 (m, 1H), 7.55 – 7.49 (m, 2H), 3.83 – 3.70 (m, 2H), 3.66 – 3.53 (m, 2H), 3.50 – 3.40 (m, 2H), 3.37 – 3.29 (m, 2H), 1.52 – 1.44 (m, 9H);  $^{13}\text{C}$  NMR (100 MHz,  $\text{CDCl}_3$ )  $\delta$  191.1, 165.6, 154.4, 130.0, 129.6, 129.1, 128.5, 128.3, 80.6, 45.7, 41.2, 28.3.

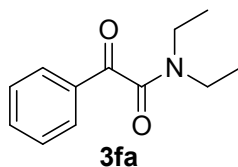

**N,N-diethyl-2-oxo-2-phenylacetamide (3fa):**  $^1\text{H}$  NMR (400 MHz,  $\text{CDCl}_3$ )  $\delta$  8.02 – 7.81 (m, 2H), 7.70 – 7.54 (m, 1H), 7.56 – 7.39 (m, 2H), 3.57 (q,  $J = 7.2$  Hz, 2H), 3.25 (q,  $J = 7.1$  Hz, 2H), 1.38 – 1.20 (m, 3H), 1.20 – 1.05 (m, 3H);  $^{13}\text{C}$  NMR (100 MHz,  $\text{CDCl}_3$ )  $\delta$  191.3, 166.7, 134.5, 130.1, 129.6, 128.9, 128.4, 42.1, 38.8, 14.1, 12.8.

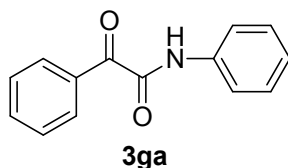

**2-oxo-N,2-diphenylacetamide (3ga):**  $^1\text{H}$  NMR (500 MHz,  $\text{CDCl}_3$ )  $\delta$  8.39 (t,  $J = 11.5$  Hz, 2H), 7.69 (t,  $J = 9.8$  Hz, 2H), 7.62 (dt,  $J = 8.4, 5.7$  Hz, 1H), 7.56 – 7.45 (m, 2H), 7.44 – 7.33 (m, 2H), 7.23 – 7.15 (m, 1H);  $^{13}\text{C}$  NMR (125 MHz,  $\text{CDCl}_3$ )  $\delta$  187.4, 158.9, 136.6, 134.6, 133.0, 131.5, 129.2, 128.6, 125.3, 119.9.

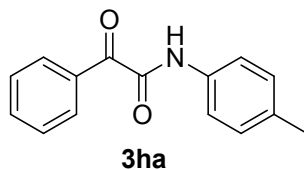

**2-oxo-2-phenyl-N-(p-tolyl)acetamide (3ha):**  $^1\text{H}$  NMR (400 MHz,  $\text{CDCl}_3$ )  $\delta$  8.92 (s, 1H), 8.47 – 8.33 (m, 2H), 7.67 – 7.60 (m, 1H), 7.58 (d,  $J = 8.4$  Hz, 2H), 7.49 (t,  $J = 7.8$  Hz, 2H), 7.19 (d,  $J = 8.2$  Hz, 2H), 2.34 (s, 3H).  $^{13}\text{C}$  NMR (100 MHz,  $\text{CDCl}_3$ )  $\delta$  187.5, 158.8, 135.0, 134.5, 134.1, 133.2, 131.5, 129.7, 128.5, 119.9, 20.9.

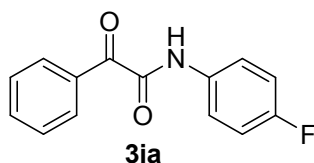

**N-(4-fluorophenyl)-2-oxo-2-phenylacetamide (3ia):**  $^1\text{H}$  NMR (500 MHz,  $\text{CDCl}_3$ ) 8.39 (d,  $J = 7.7$  Hz, 2H), 7.73 – 7.61 (m, 3H), 7.50 (t,  $J = 7.7$  Hz, 2H), 7.08 (t,  $J = 8.6$  Hz, 2H).  $^{13}\text{C}$  NMR (125 MHz,  $\text{CDCl}_3$ )  $\delta$  187.3, 160.8, 158.9, 134.7, 133.0, 132.7, 131.5, 128.6, 121.7, 116.1, 115.9.

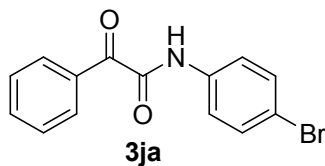

**N-(4-bromophenyl)-2-oxo-2-phenylacetamide (3ja):**  $^1\text{H}$  NMR (500 MHz,  $\text{CDCl}_3$ )  $\delta$  8.39 (d,  $J = 7.8$  Hz, 2H), 7.66 (t,  $J = 6.4$  Hz, 1H), 7.59 (t,  $J = 13.5$  Hz, 2H), 7.50 (t,  $J = 7.6$  Hz, 4H);  $^{13}\text{C}$  NMR (125 MHz,  $\text{CDCl}_3$ )  $\delta$  187.0, 158.8, 135.7, 134.8, 132.9, 132.2, 131.5, 128.6, 121.4, 118.0.

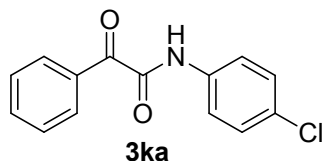

**N-(4-chlorophenyl)-2-oxo-2-phenylacetamide (3ka):**  $^1\text{H}$  NMR (400 MHz,  $\text{CDCl}_3$ )  $\delta$  8.54 – 8.28 (m, 2H), 7.77 – 7.63 (m, 3H), 7.59 – 7.40 (m, 2H), 7.16 – 7.01 (m, 2H);  $^{13}\text{C}$  NMR (100 MHz,  $\text{CDCl}_3$ )  $\delta$  187.2, 161.1, 158.7, 134.7, 131.4, 128.5, 121.7, 121.6, 116.1, 115.8

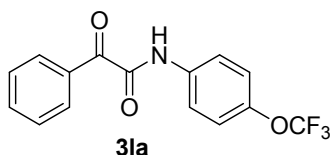

**2-oxo-2-phenyl-N-(4-(trifluoromethoxy)phenyl)acetamide (3la):**  $^1\text{H}$  NMR (400 MHz,  $\text{CDCl}_3$ ) 8.38 – 8.23 (m, 2H), 7.69 – 7.63 (m, 2H), 7.57 (t,  $J = 7.4$  Hz, 1H), 7.42 (t,  $J = 7.8$  Hz, 2H), 7.19 – 7.12 (m, 2H);  $^{13}\text{C}$  NMR (100 MHz,  $\text{CDCl}_3$ )  $\delta$  187.1, 158.9, 145.9, 135.3, 134.8, 132.9, 131.5, 128.6, 121.9, 121.5, 121.2, 119.4.

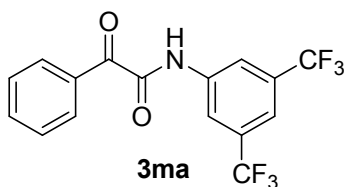

**N-(3,5-bis(trifluoromethyl)phenyl)-2-oxo-2-phenylacetamide (3ma):**  $^1\text{H}$  NMR (400 MHz,  $\text{CDCl}_3$ ) 8.42 (d,  $J = 7.7$  Hz, 2H), 8.24 (s, 2H), 7.69 (d,  $J = 11.3$  Hz, 2H), 7.53 (t,  $J = 7.5$  Hz, 2H);  $^{13}\text{C}$  NMR (100 MHz,  $\text{CDCl}_3$ )  $\delta$  186.4, 159.1, 138.1, 135.2, 132.8, 132.5, 131.5, 128.8, 124.1, 121.8, 119.7, 118.5.

# Spectral Graphs

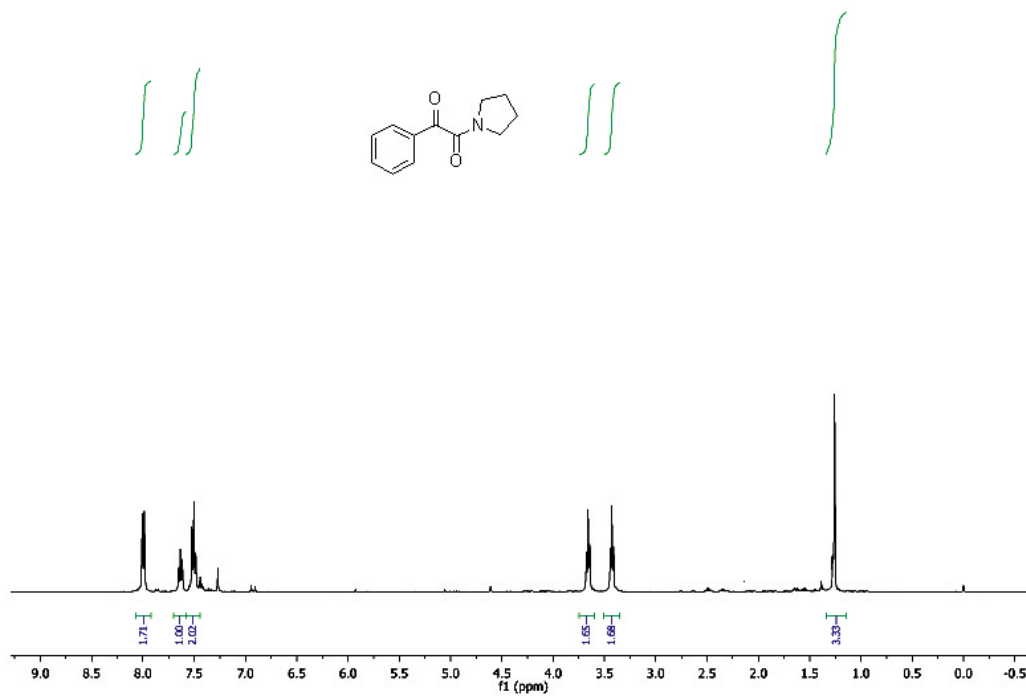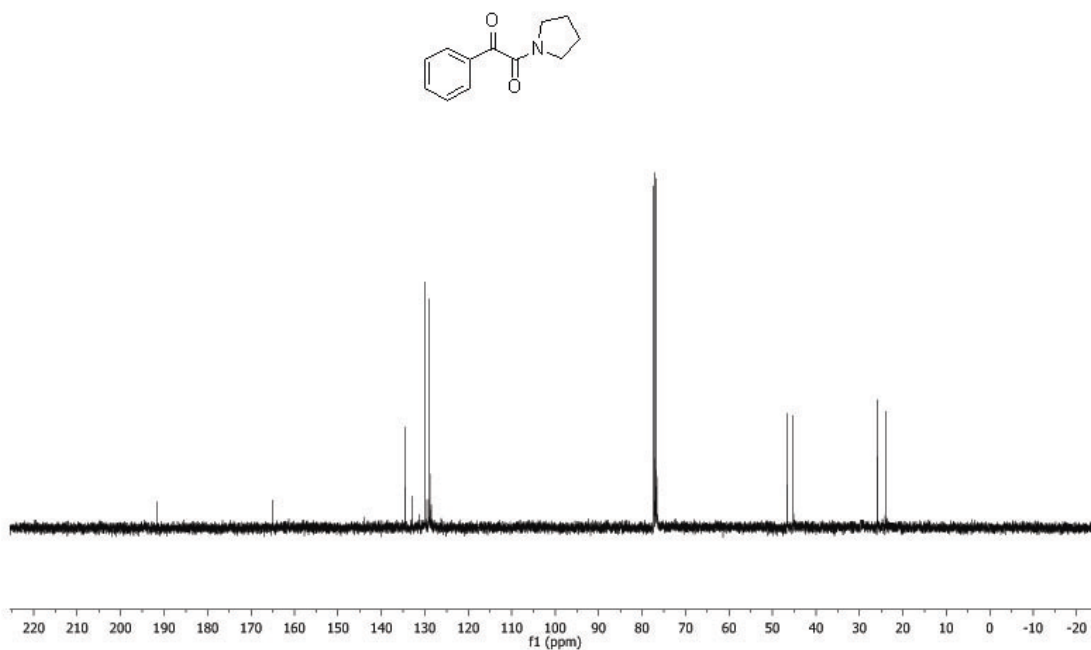



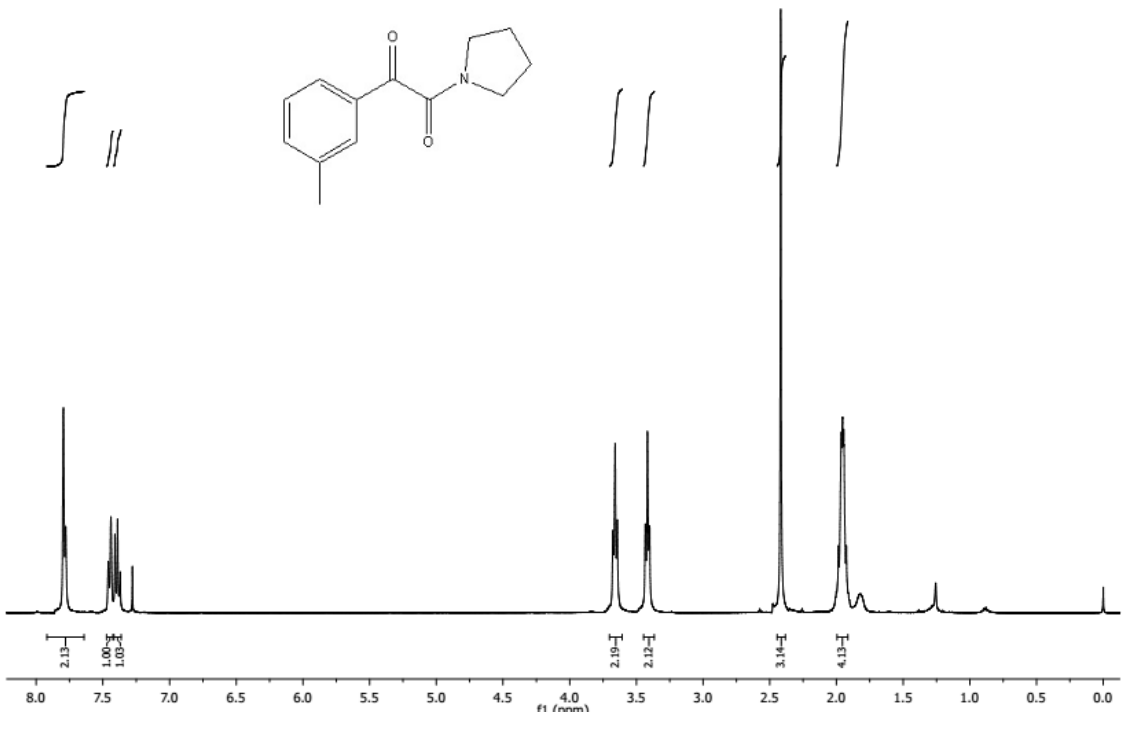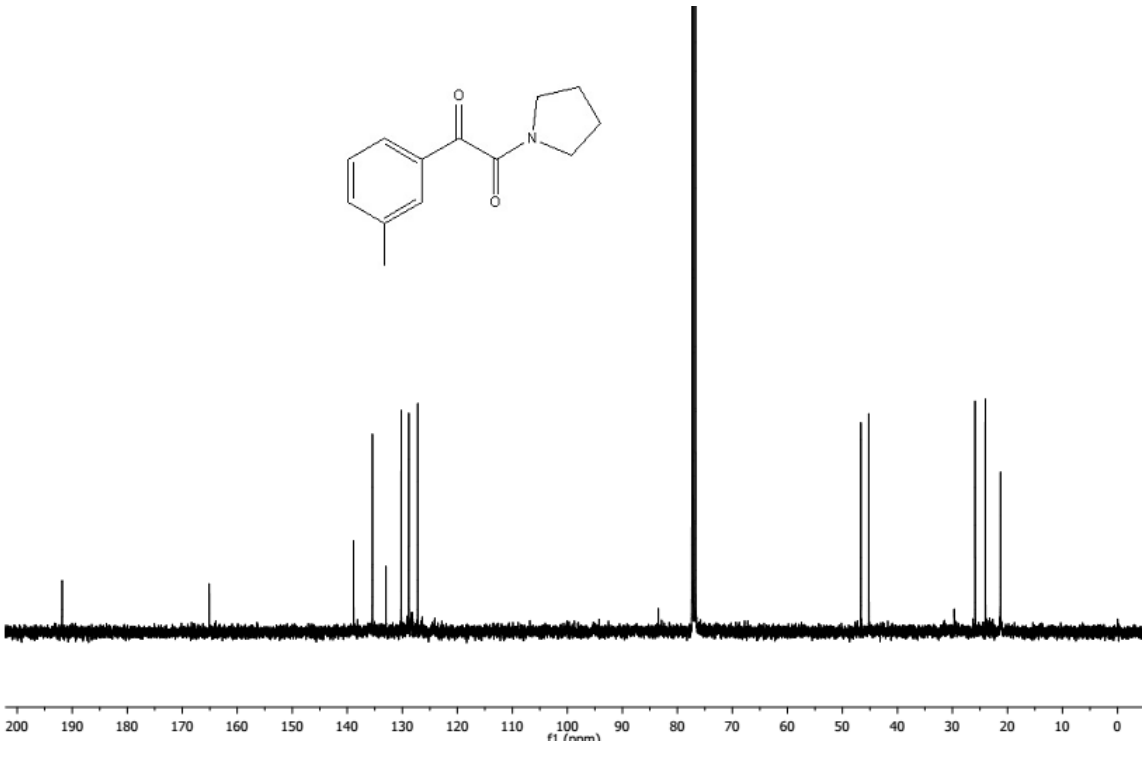

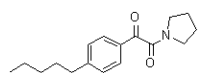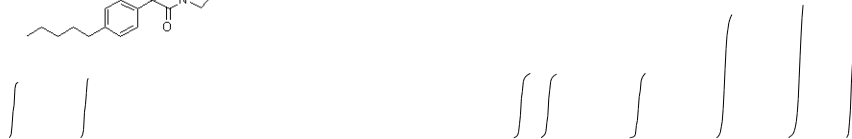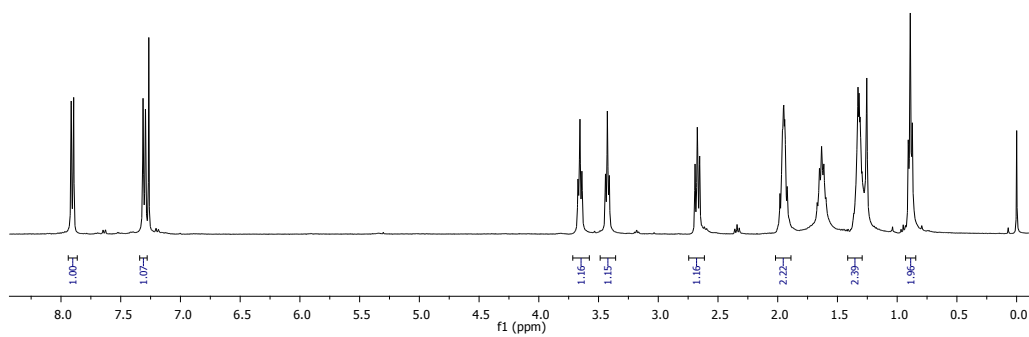

191.34  
165.22  
150.74  
130.71  
130.06  
129.02

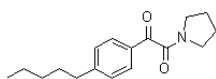

46.68  
45.20  
36.16  
31.38  
30.68  
25.91  
24.04  
22.46  
13.95

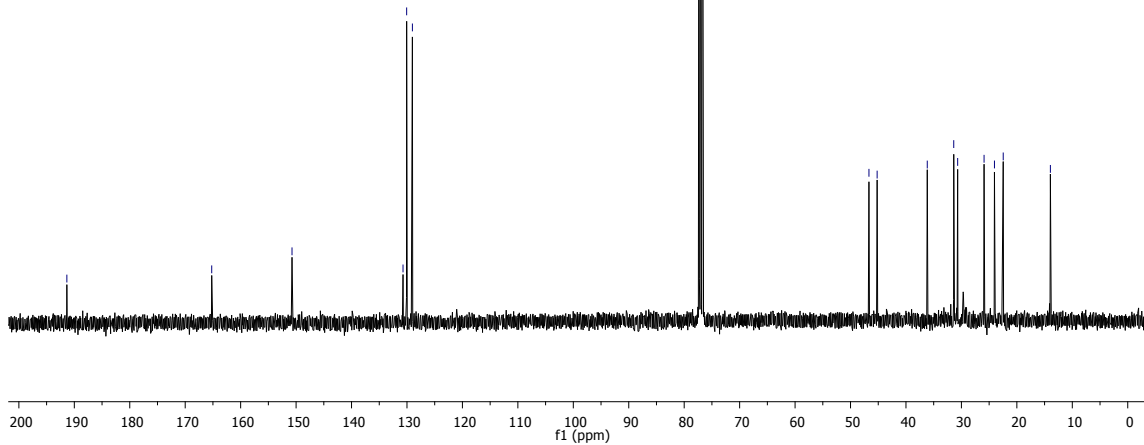

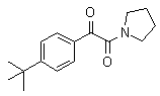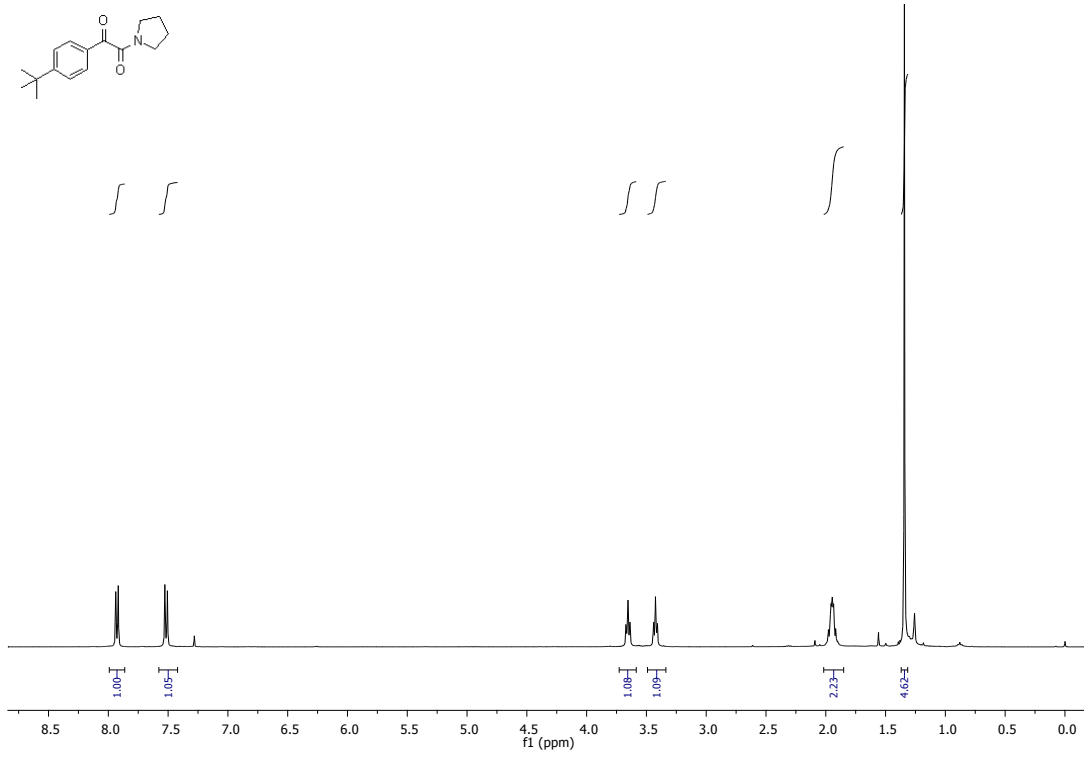

191.37

165.23

158.69

130.34

129.88

125.98

46.69

45.21

35.35

25.92

24.05

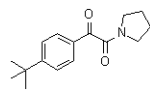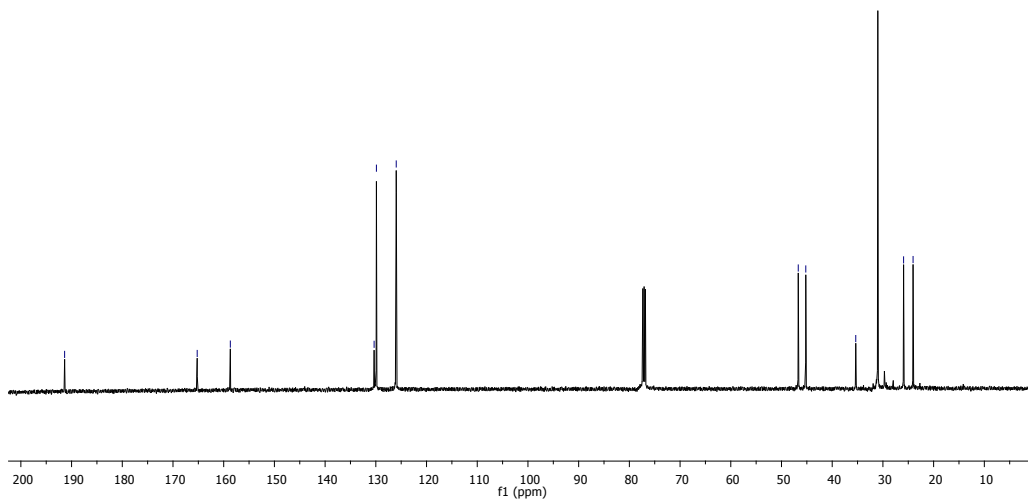

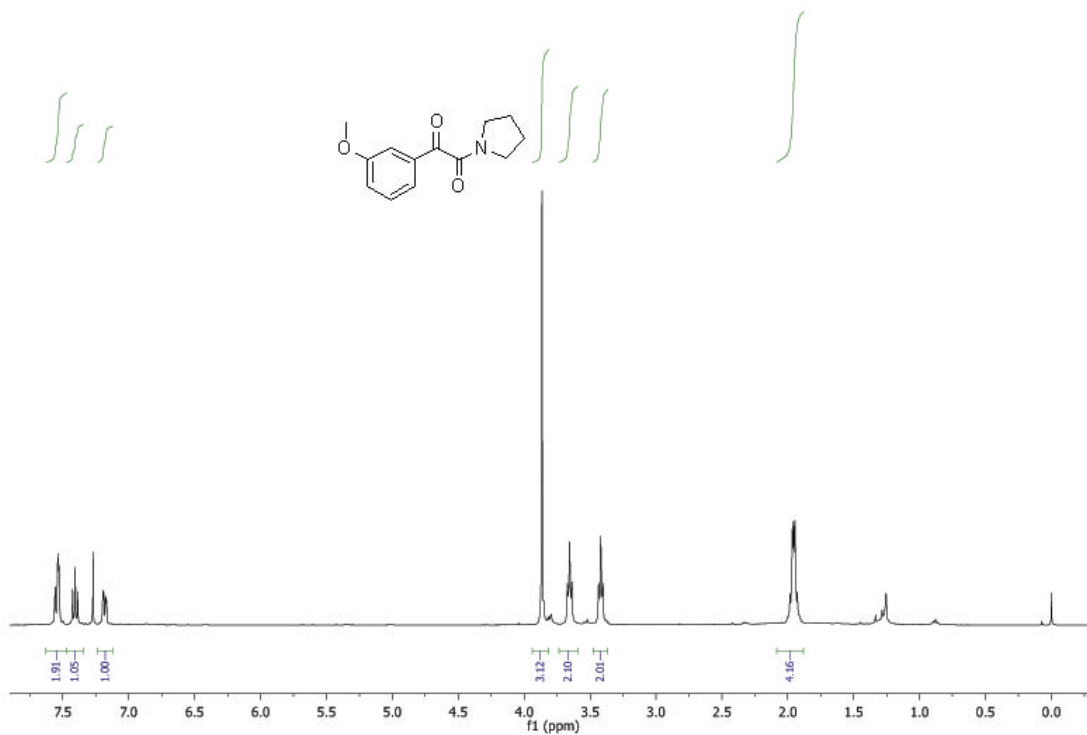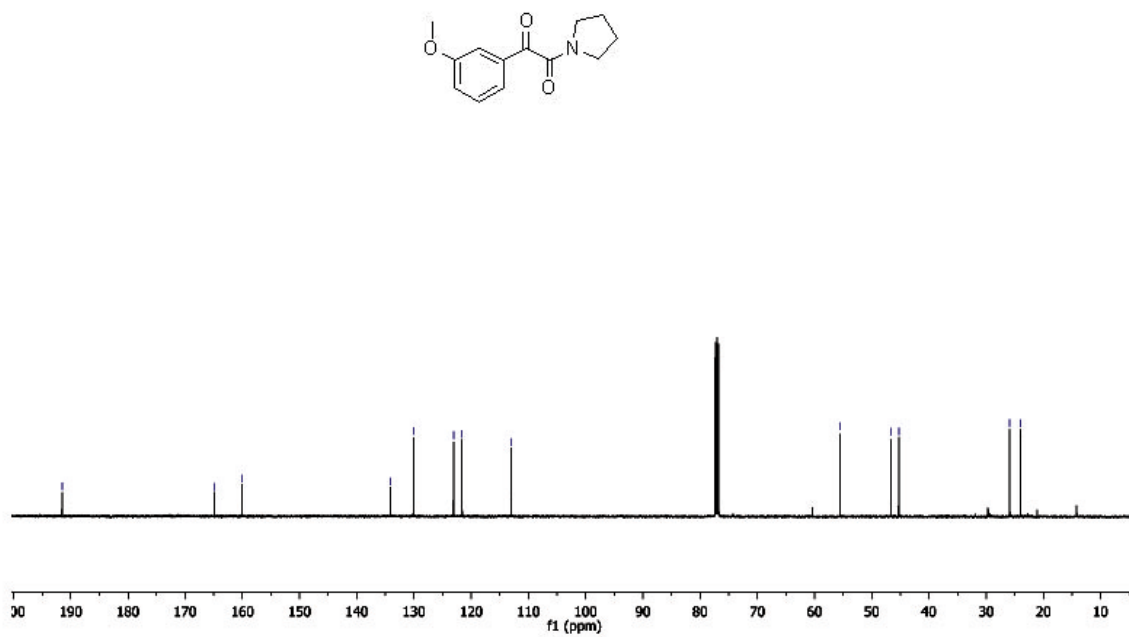

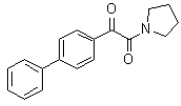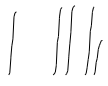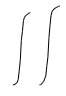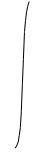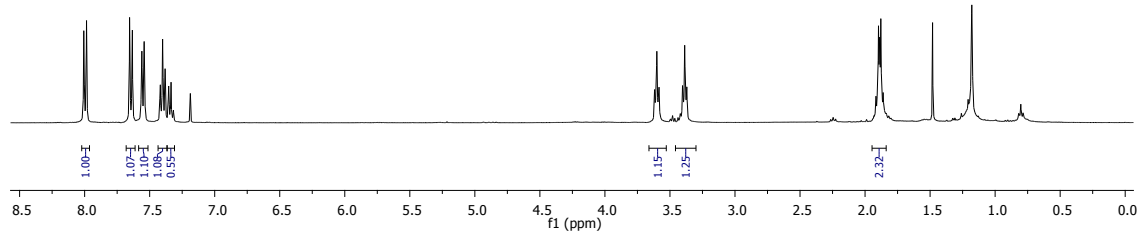

- 191.14
- 164.96
- 147.30
- 139.65
- 131.75
- 130.50
- 129.02
- 128.55
- 127.57
- 127.35
- 46.74
- 45.30
- 25.94
- 24.04

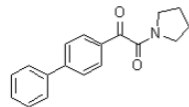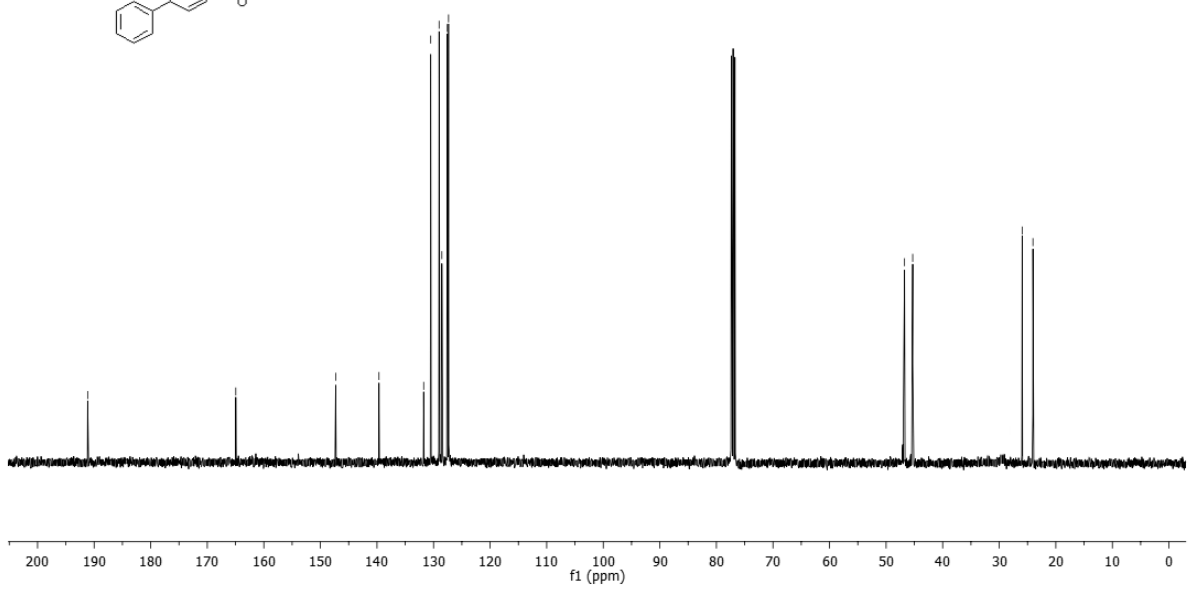

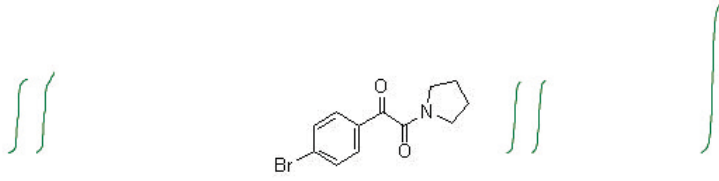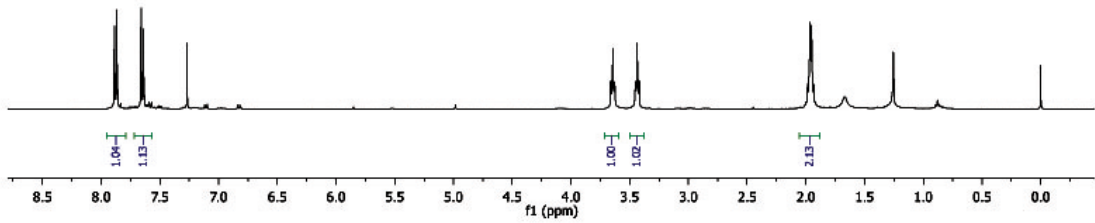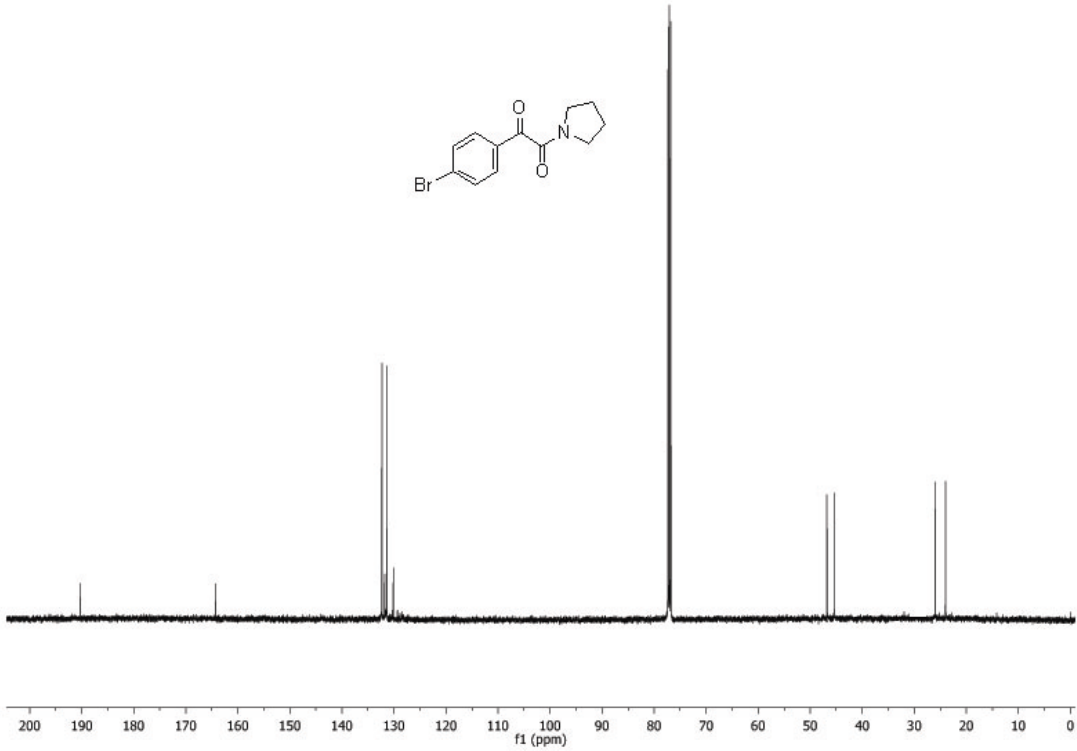

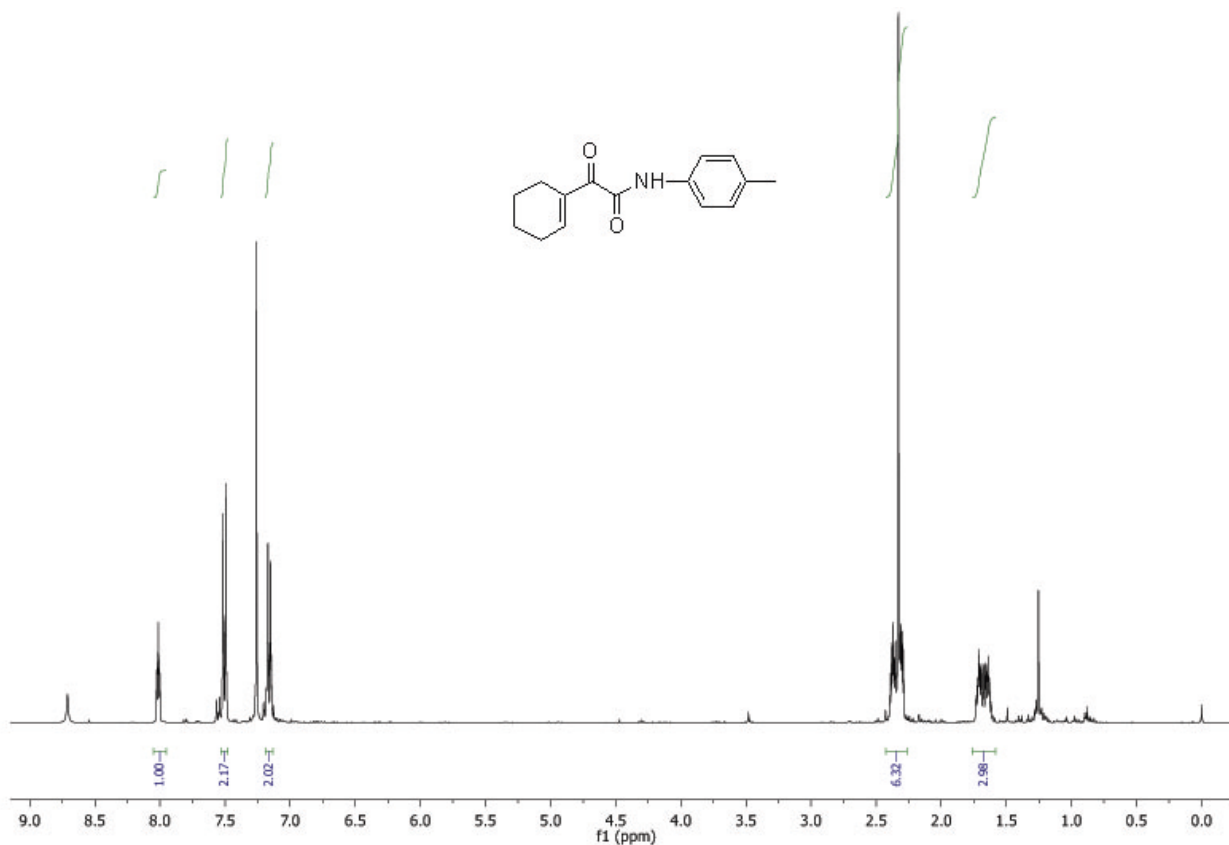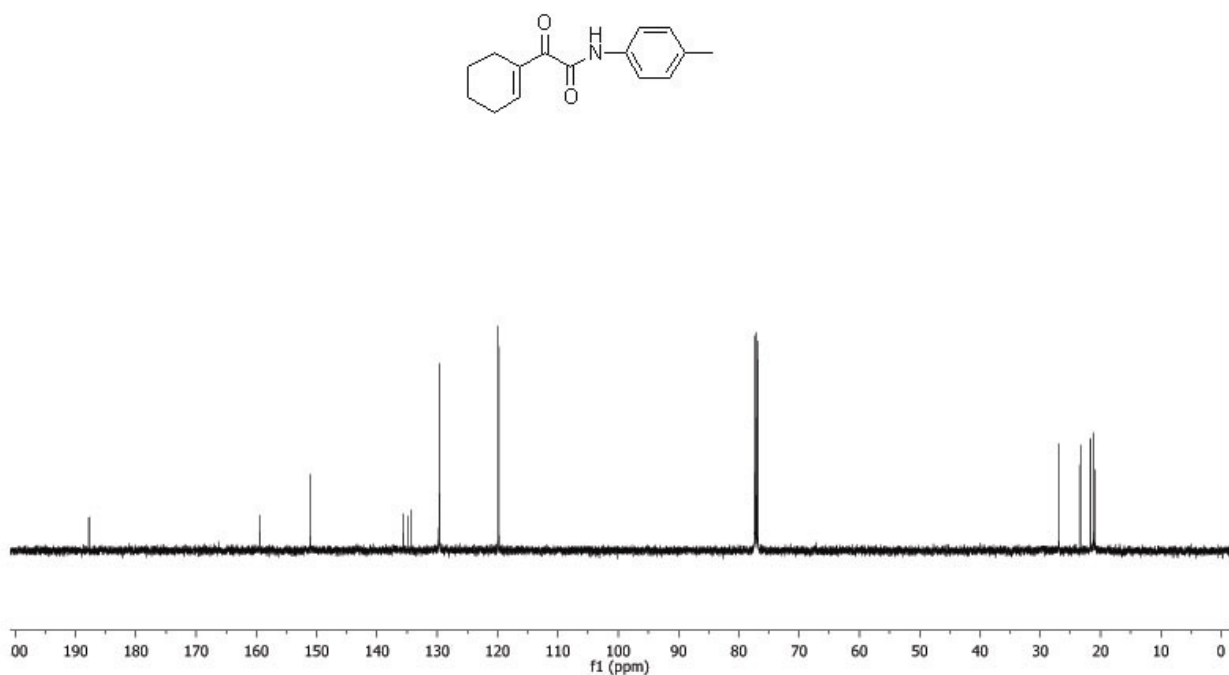

1.73  
1.00  
1.86

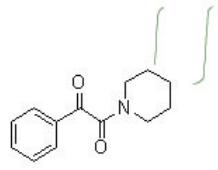

4.00  
3.03

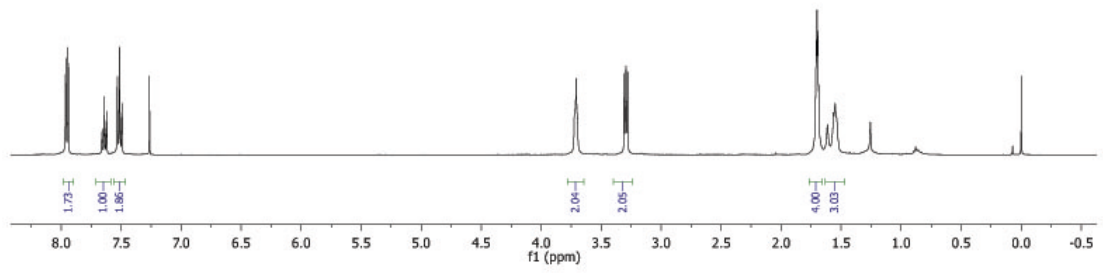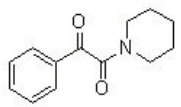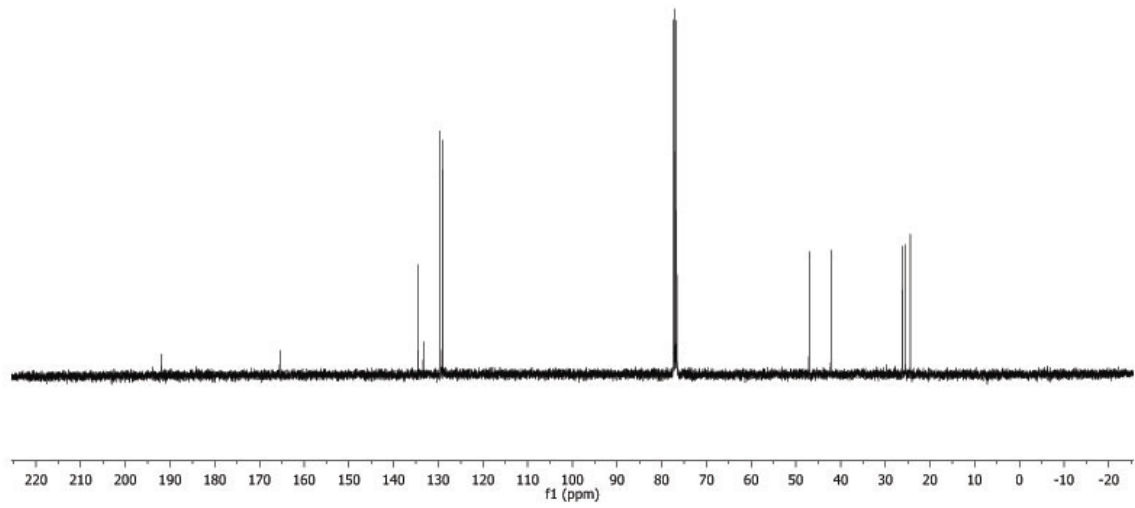



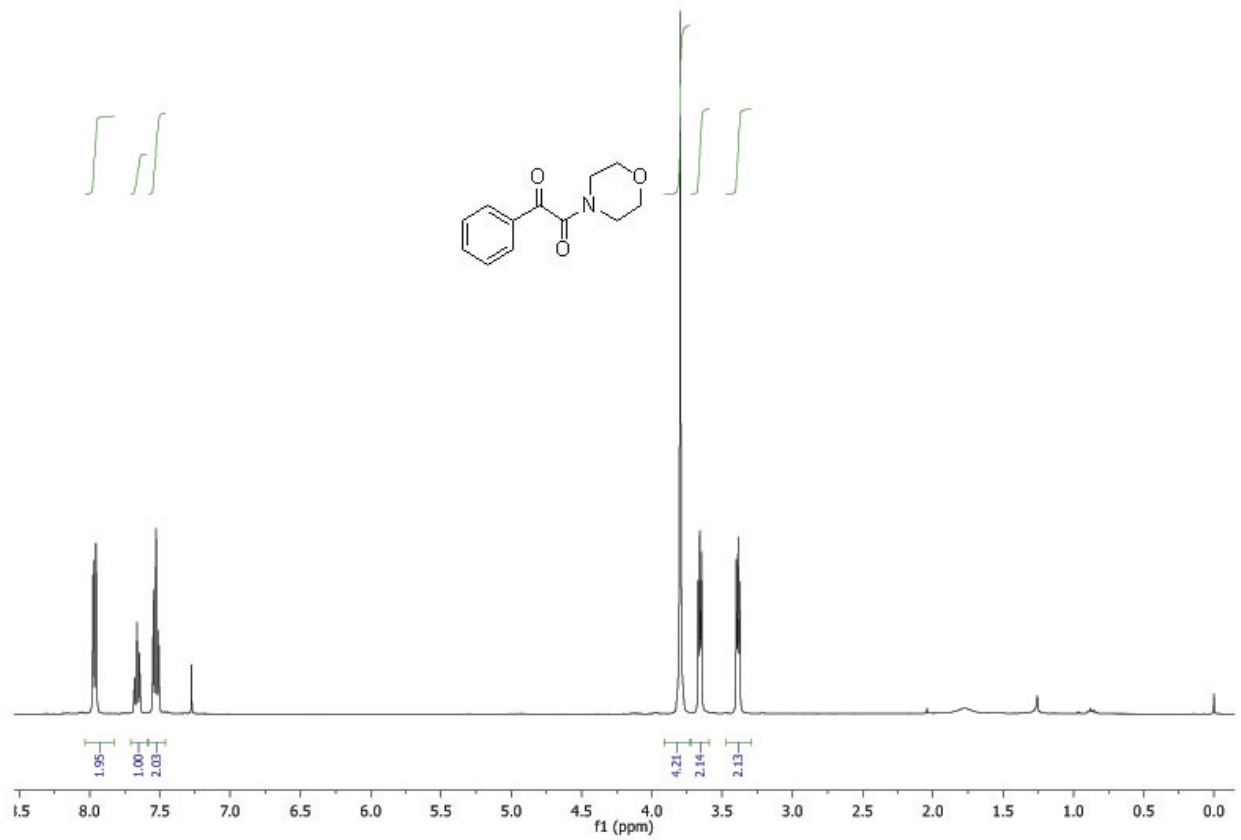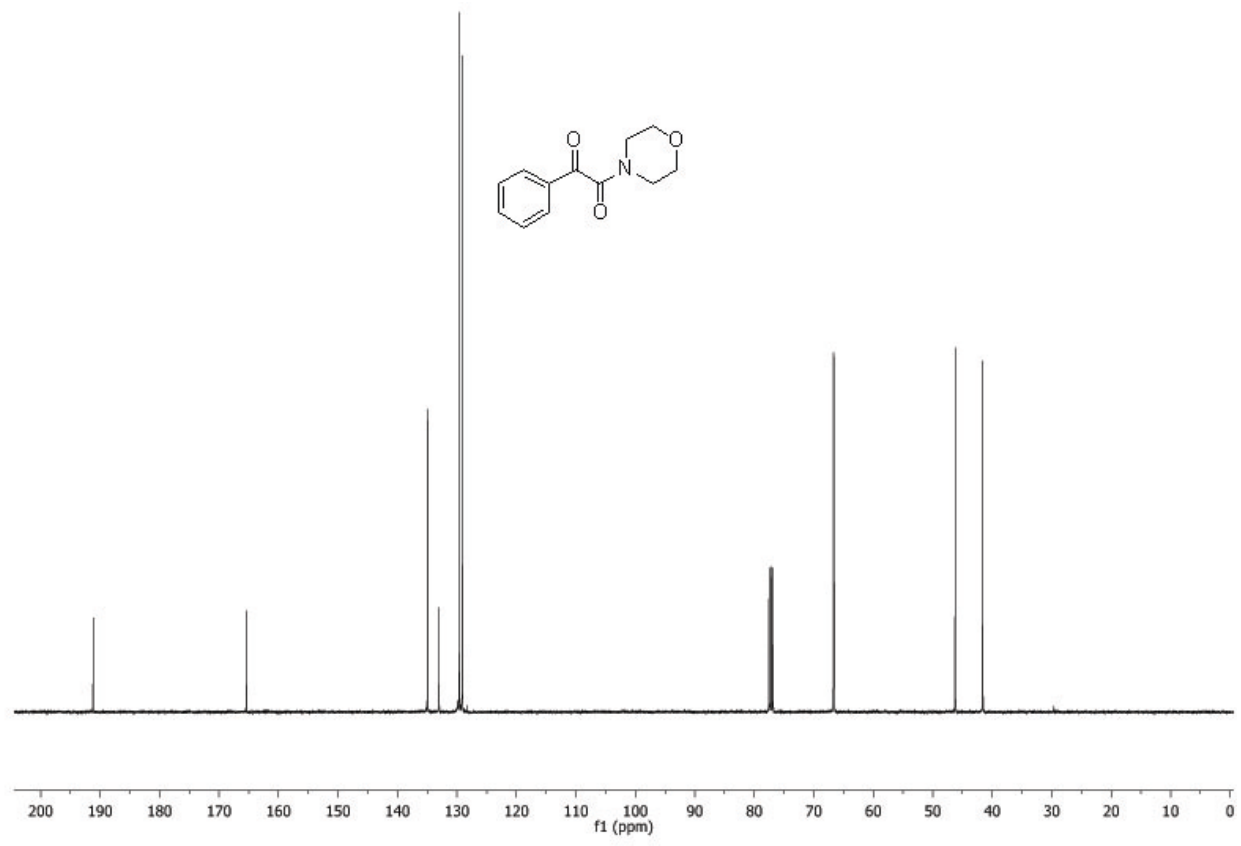

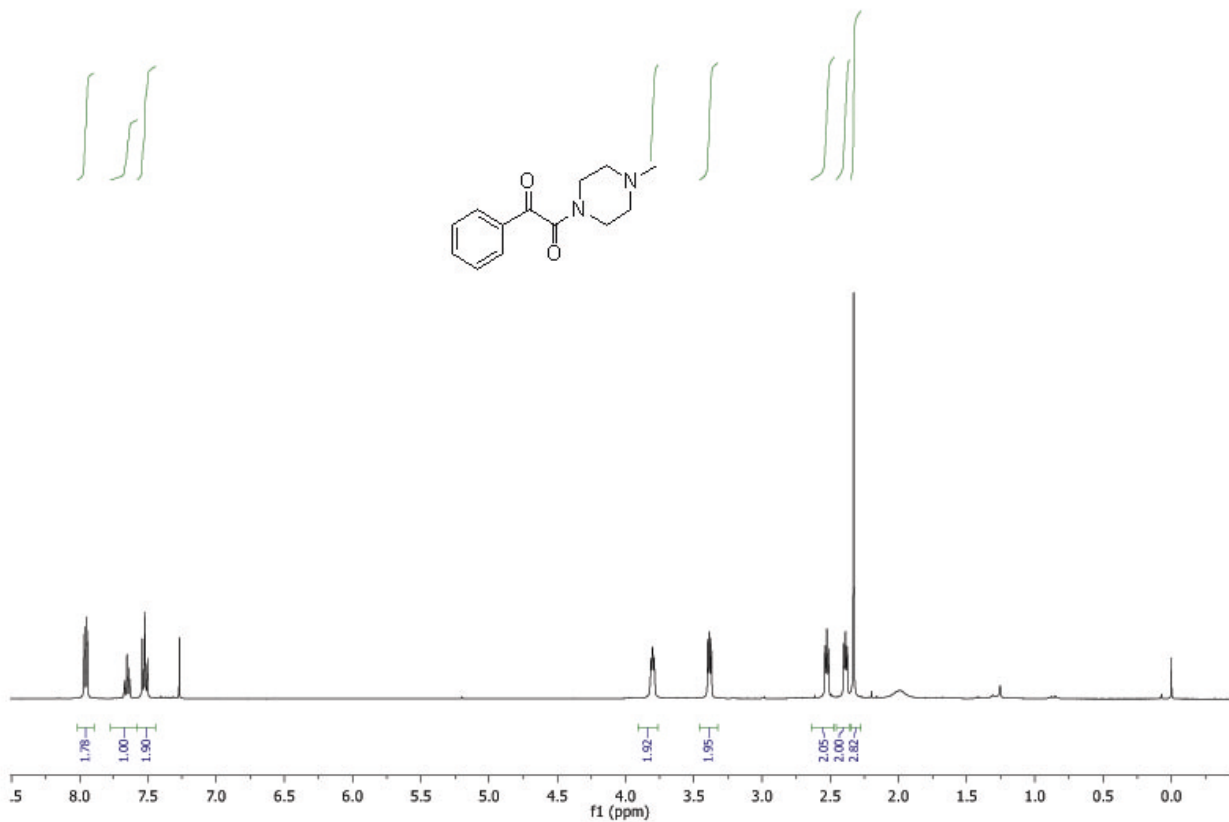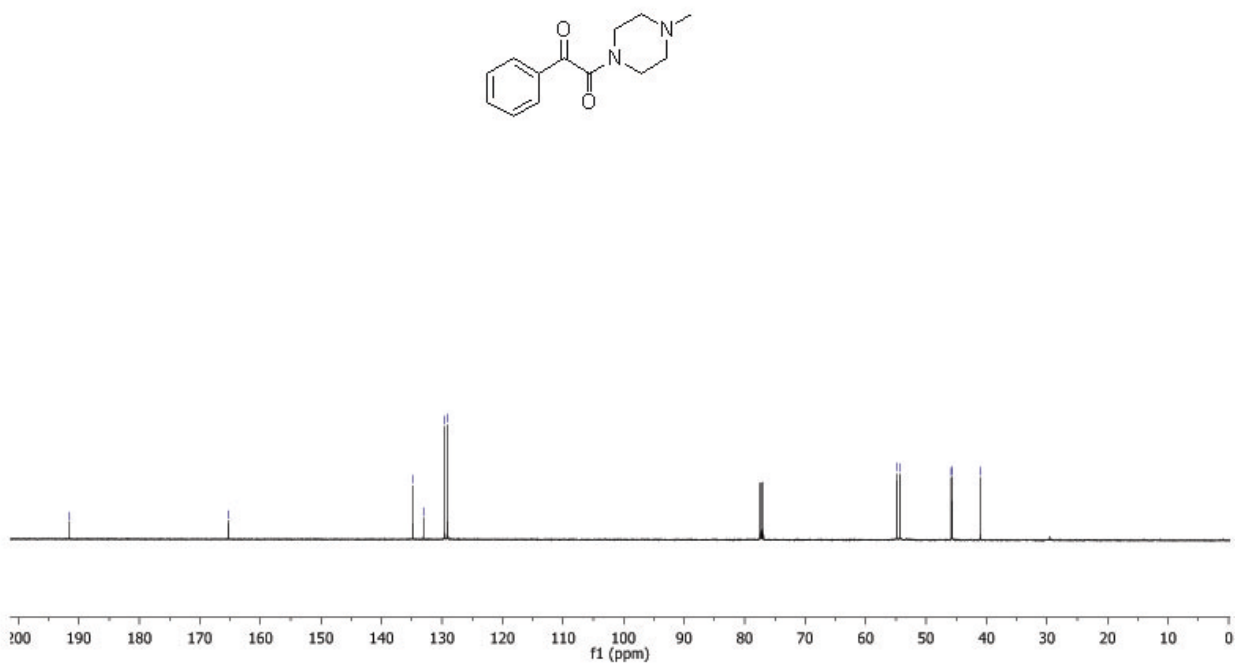

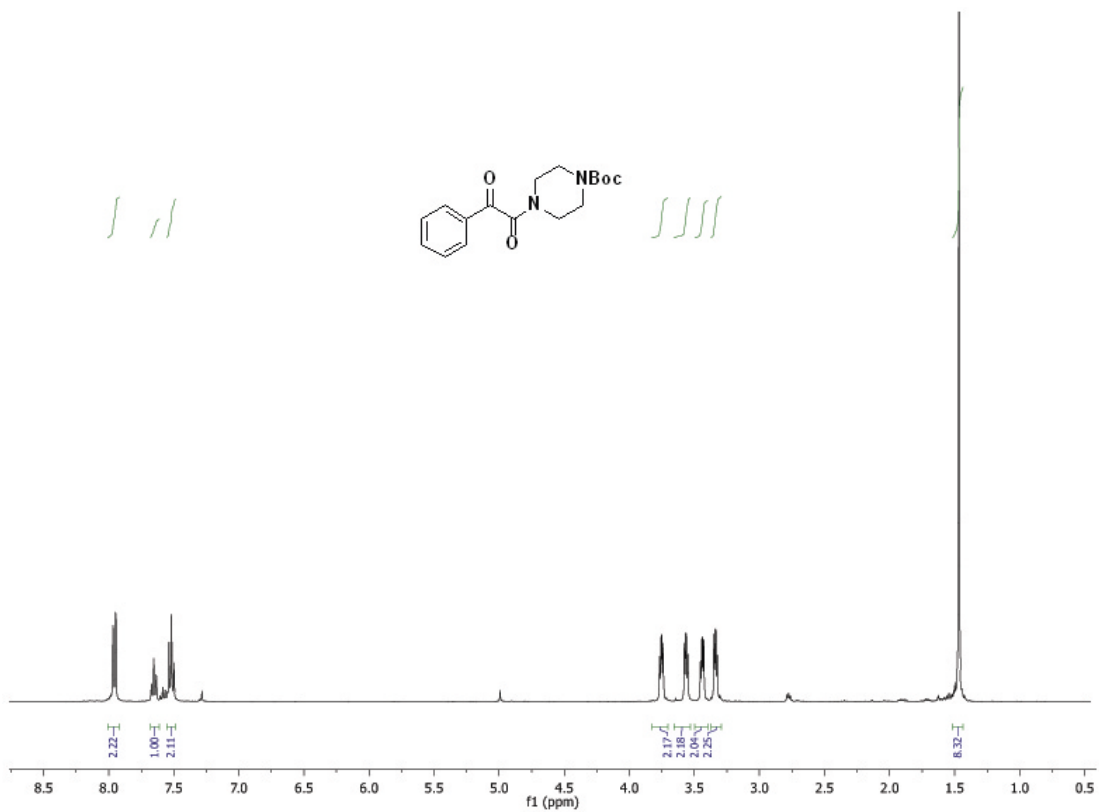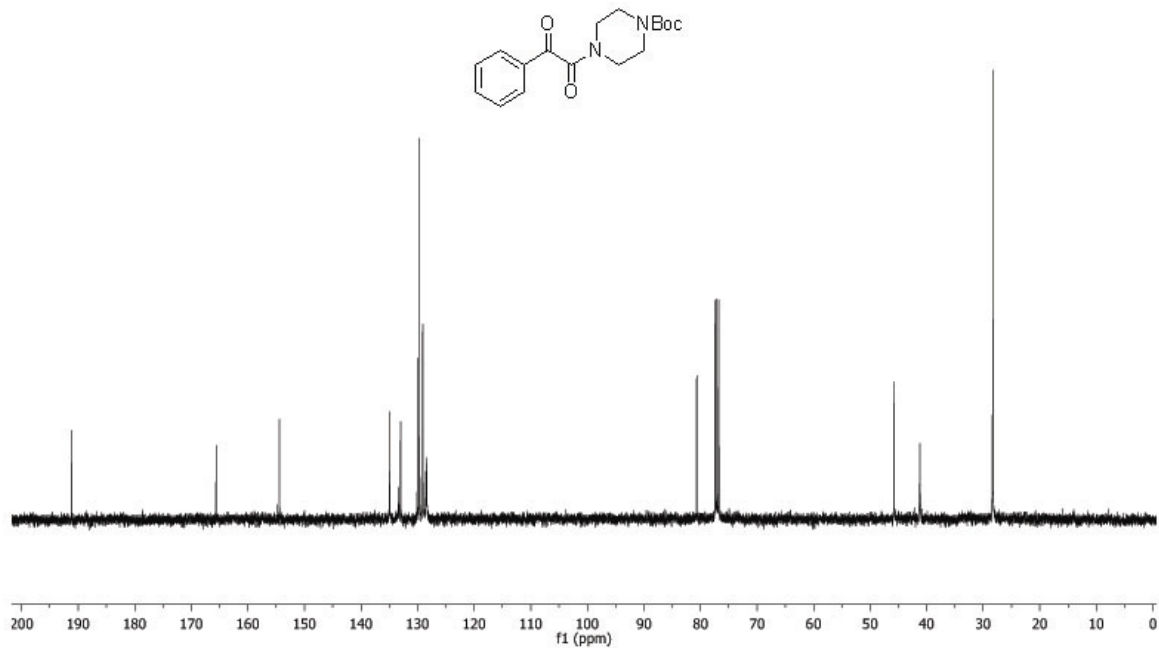

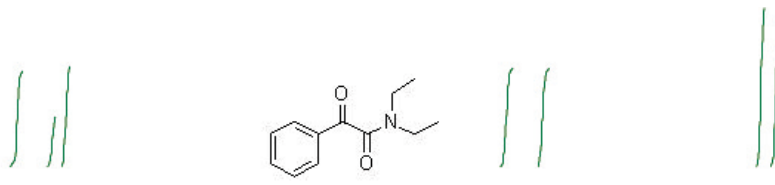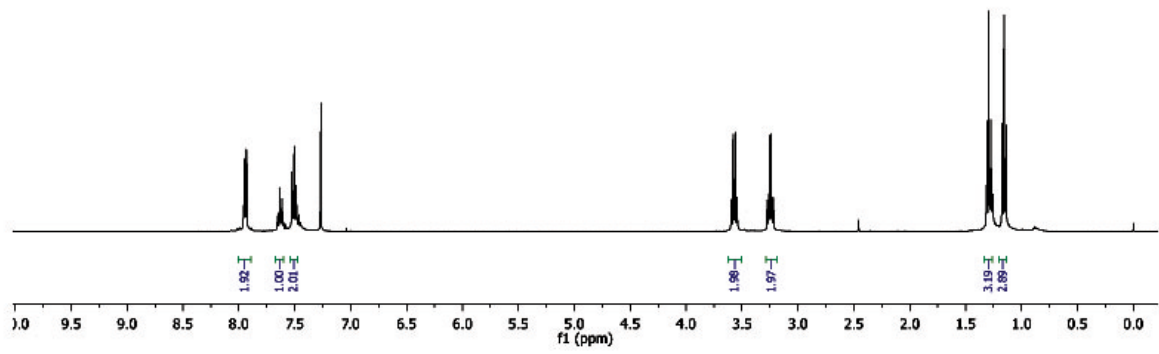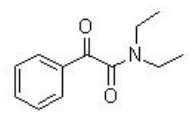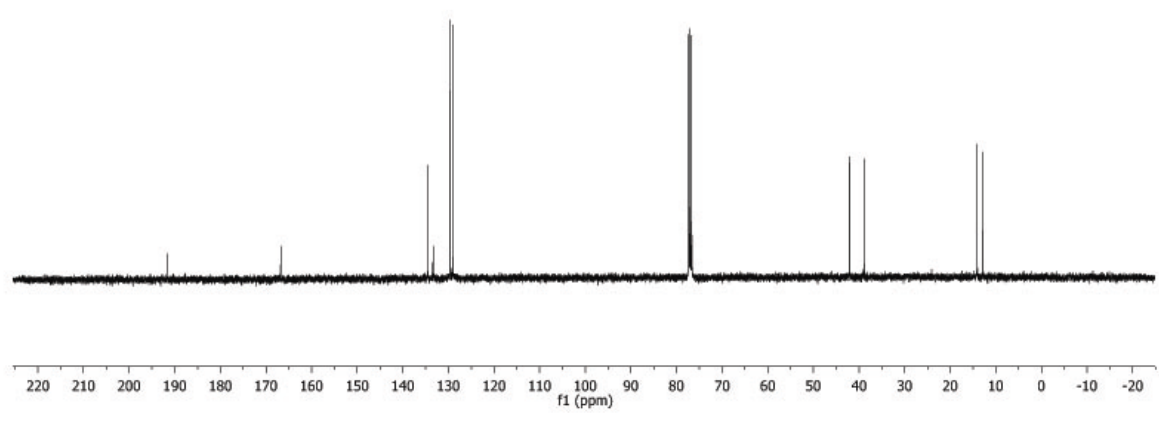

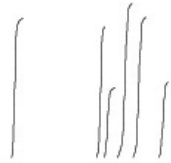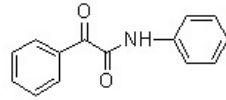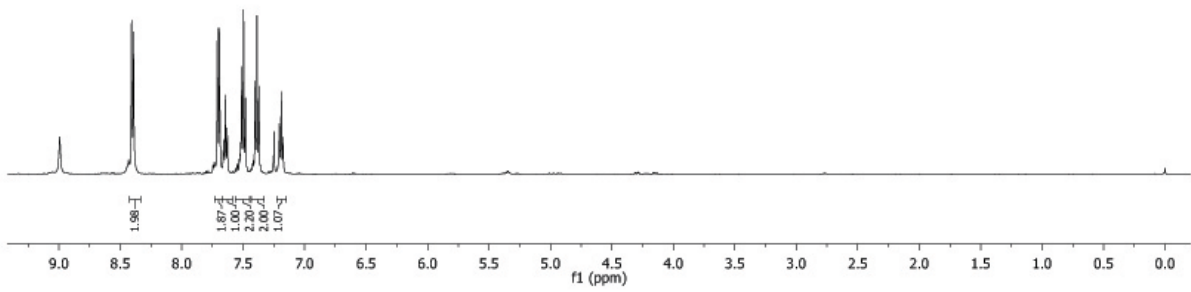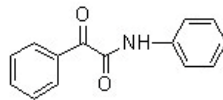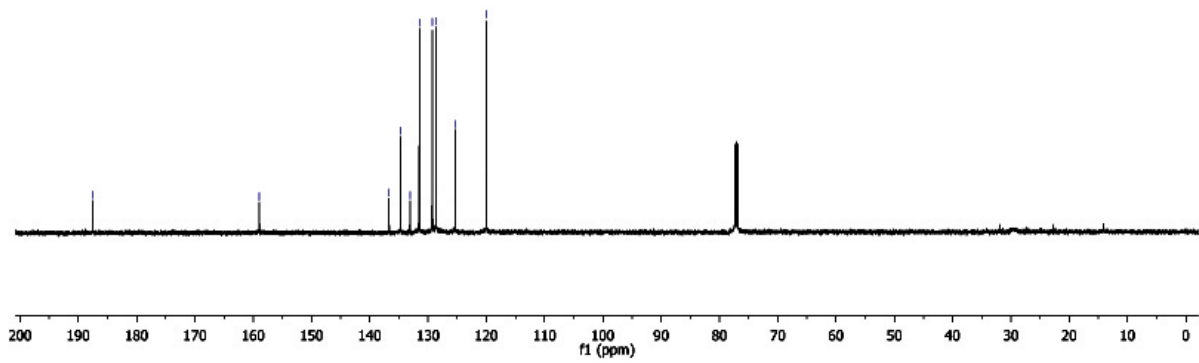

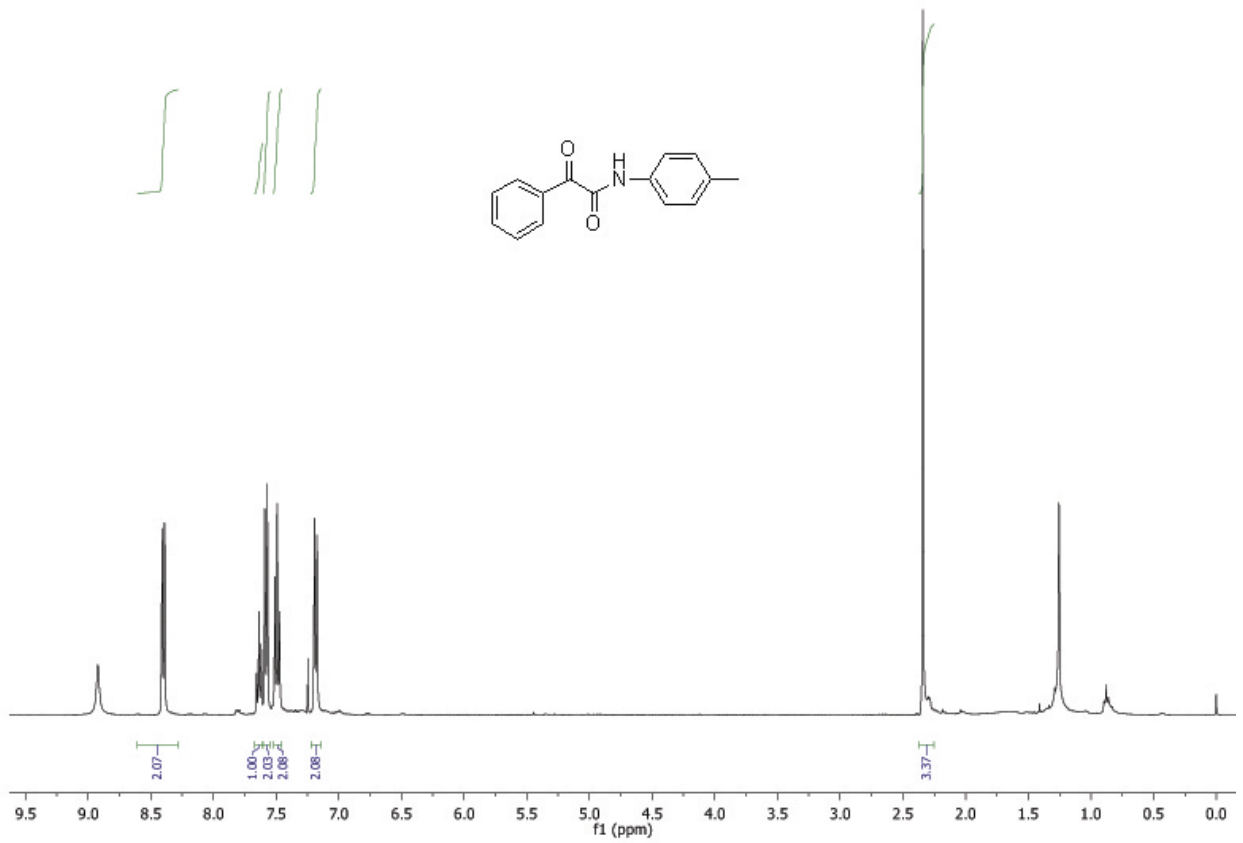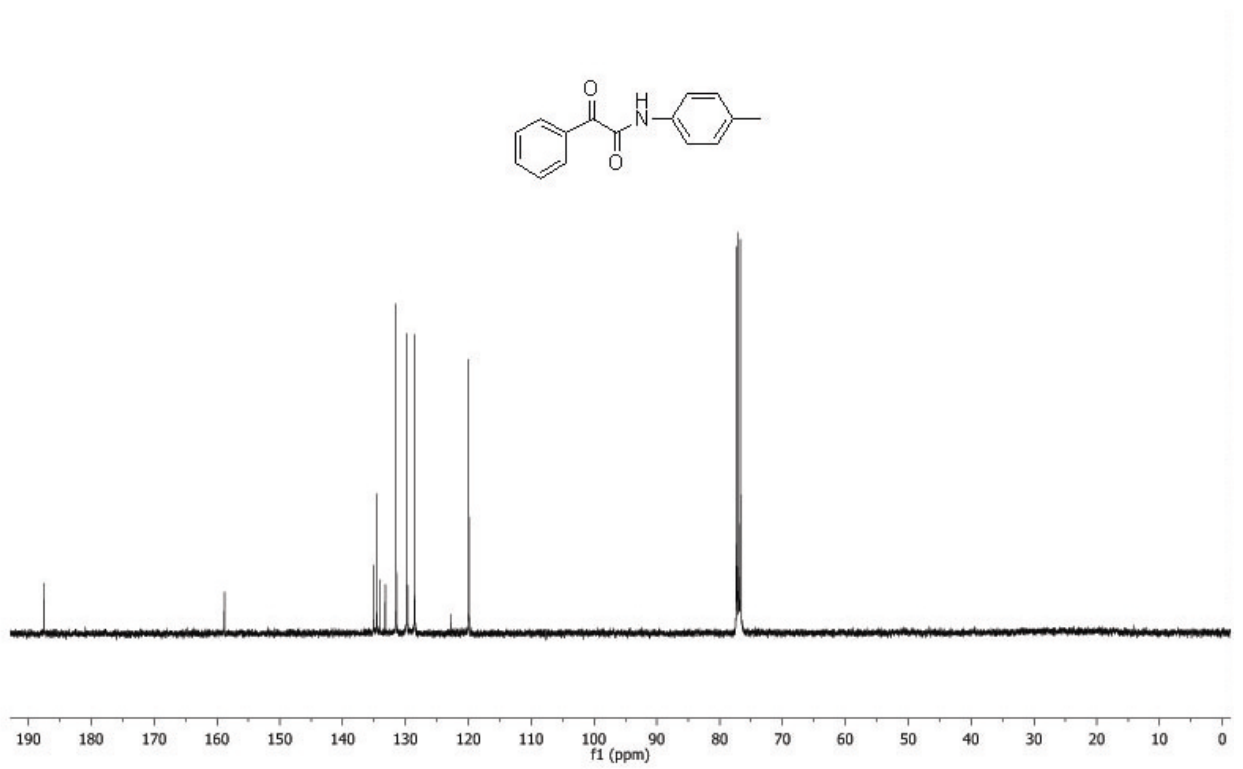

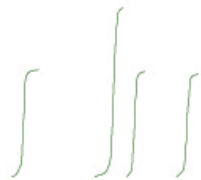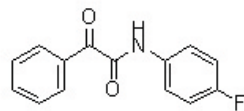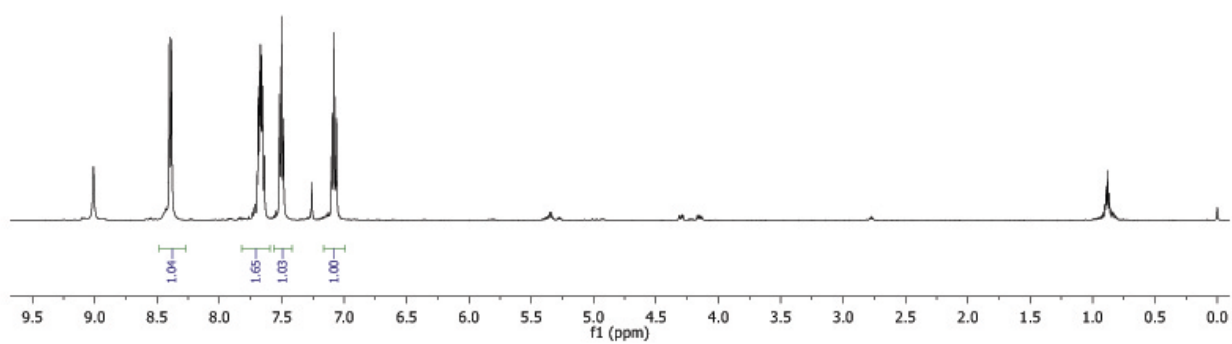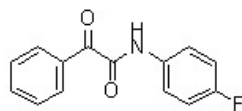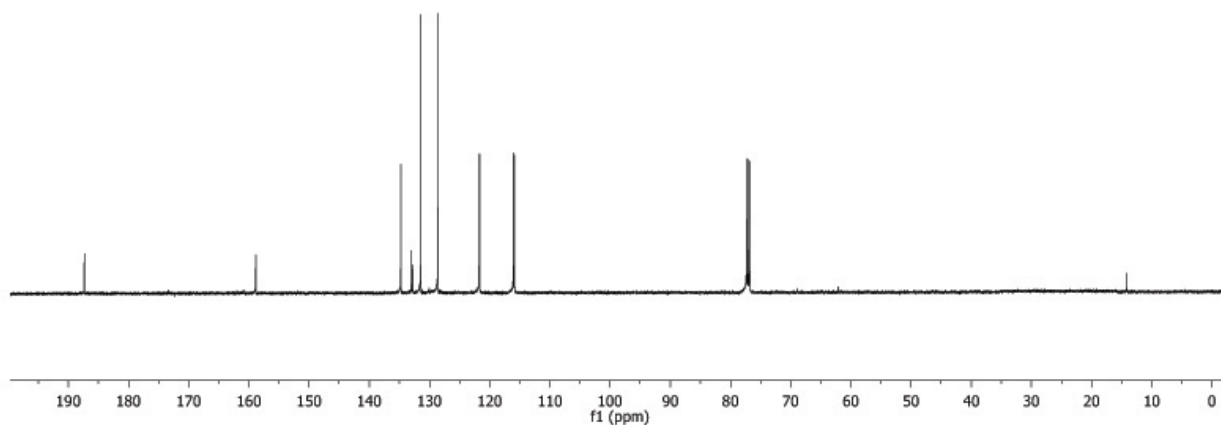

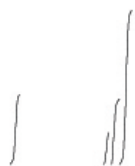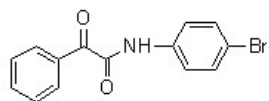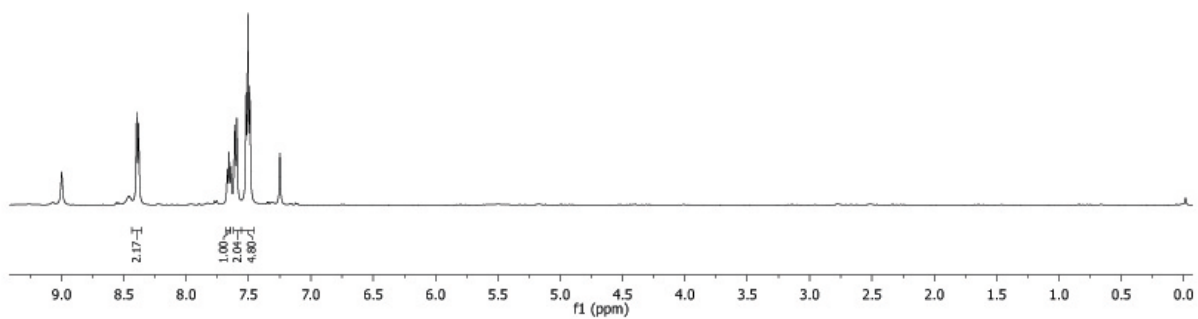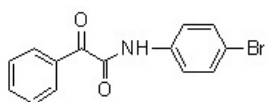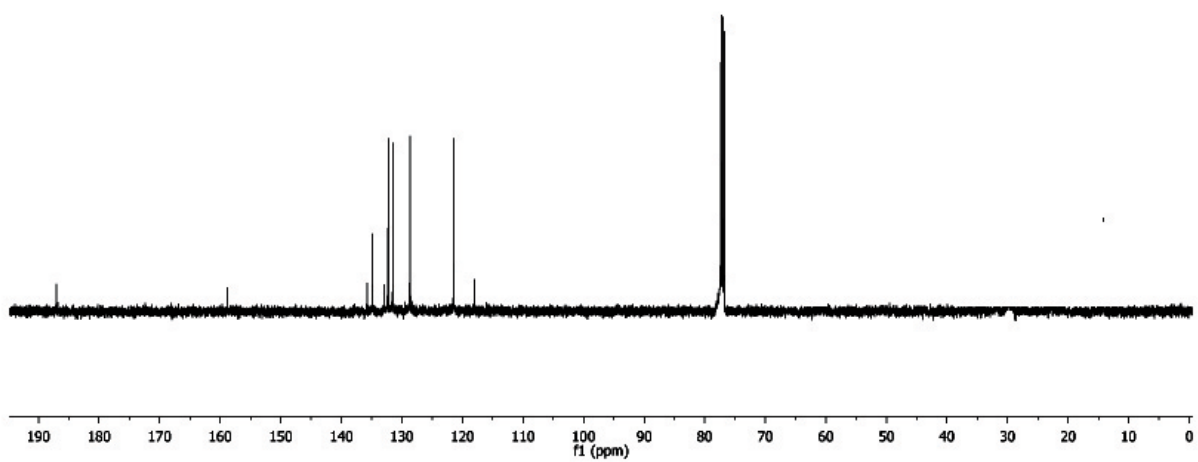



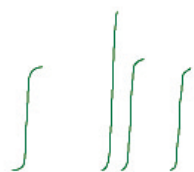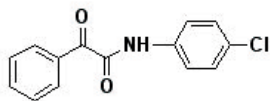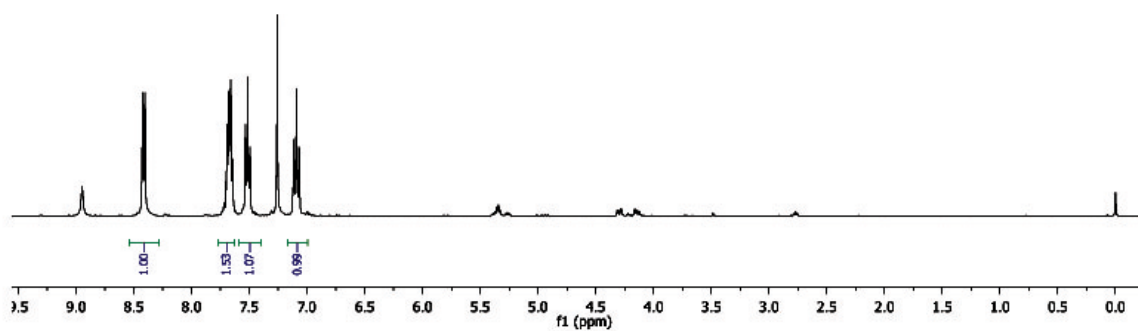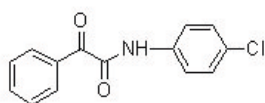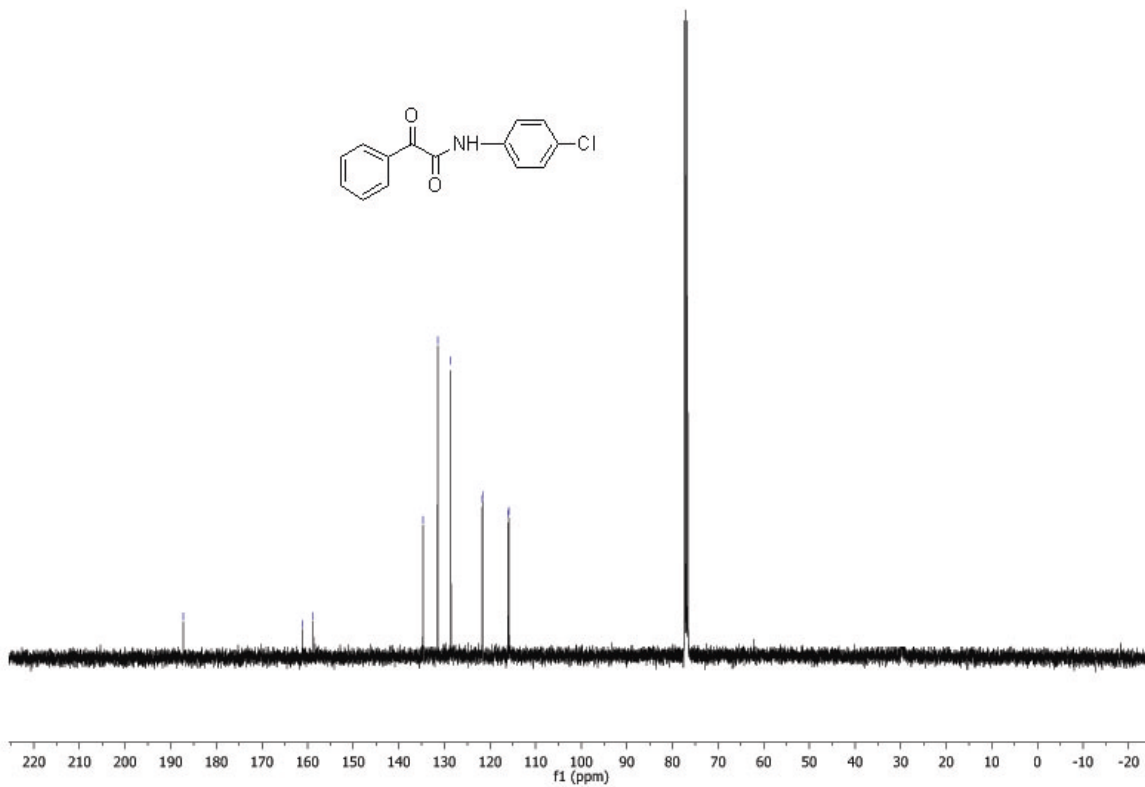

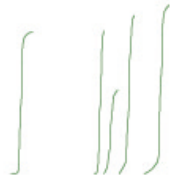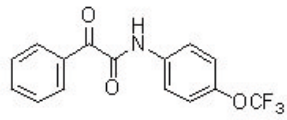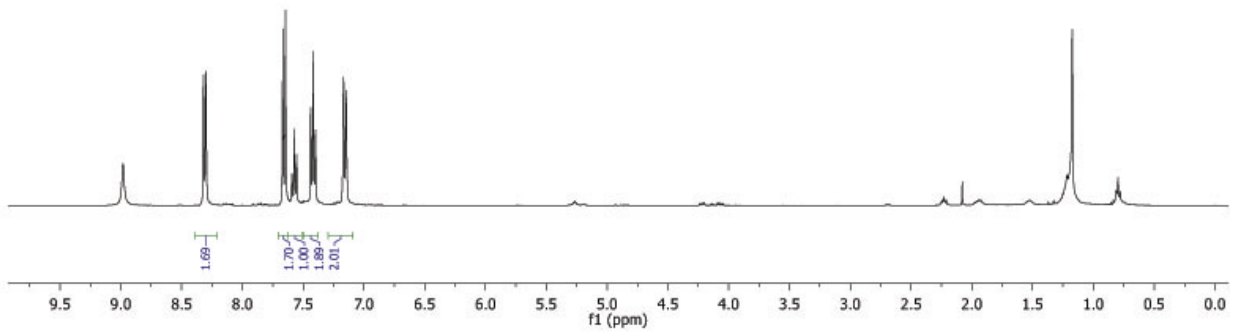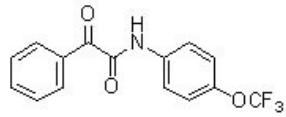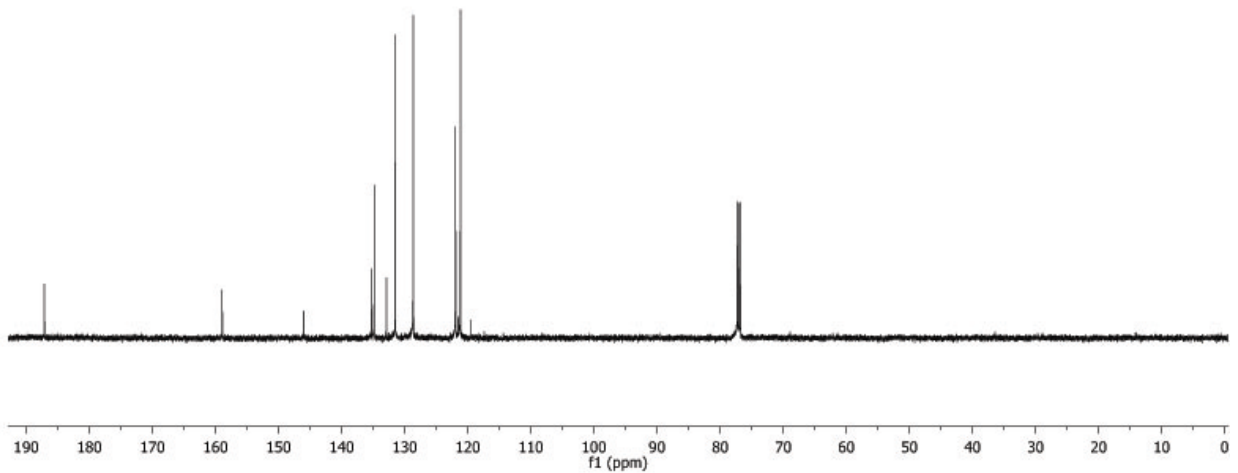

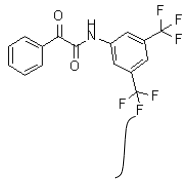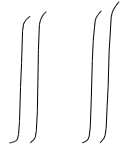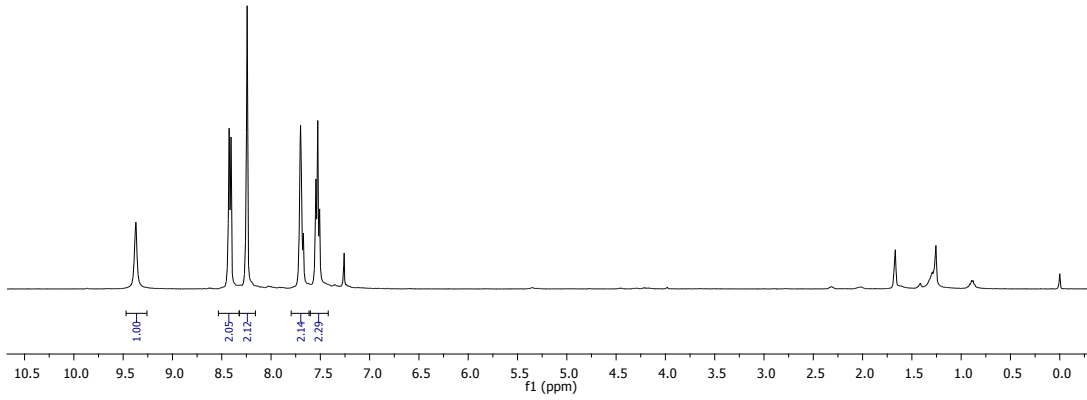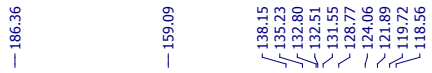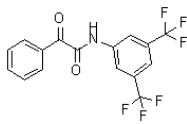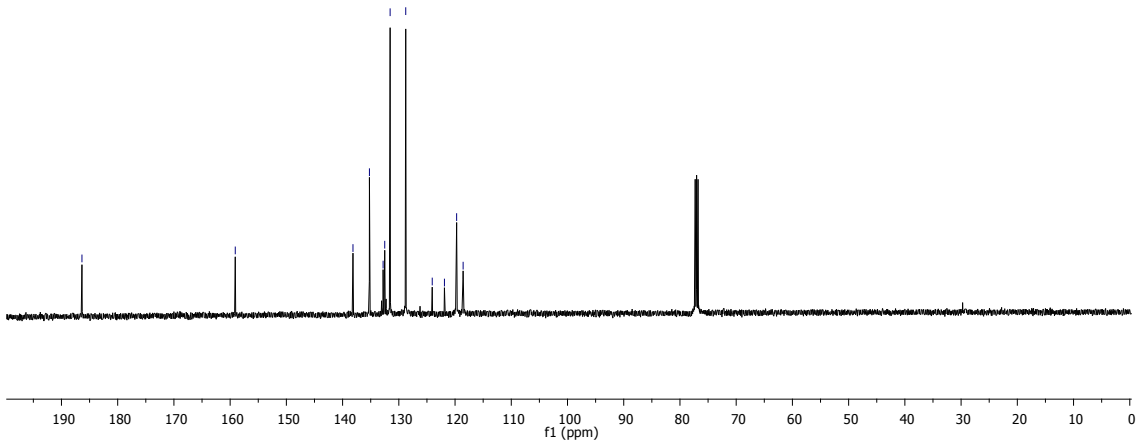

Supplement: c4cc03783a1.pdf [file c4cc03783a1.pdf]
